# Supplementary material for: Bacterial Community Dynamics in Full-Scale Activated Sludge Bioreactors: Operational and Ecological Factors Driving Community Assembly and Performance
Source: PubMed Central journal article supplement (PMC3411768; doi:10.1371/journal.pone.0042524), 2012-08-03

Figure S1.

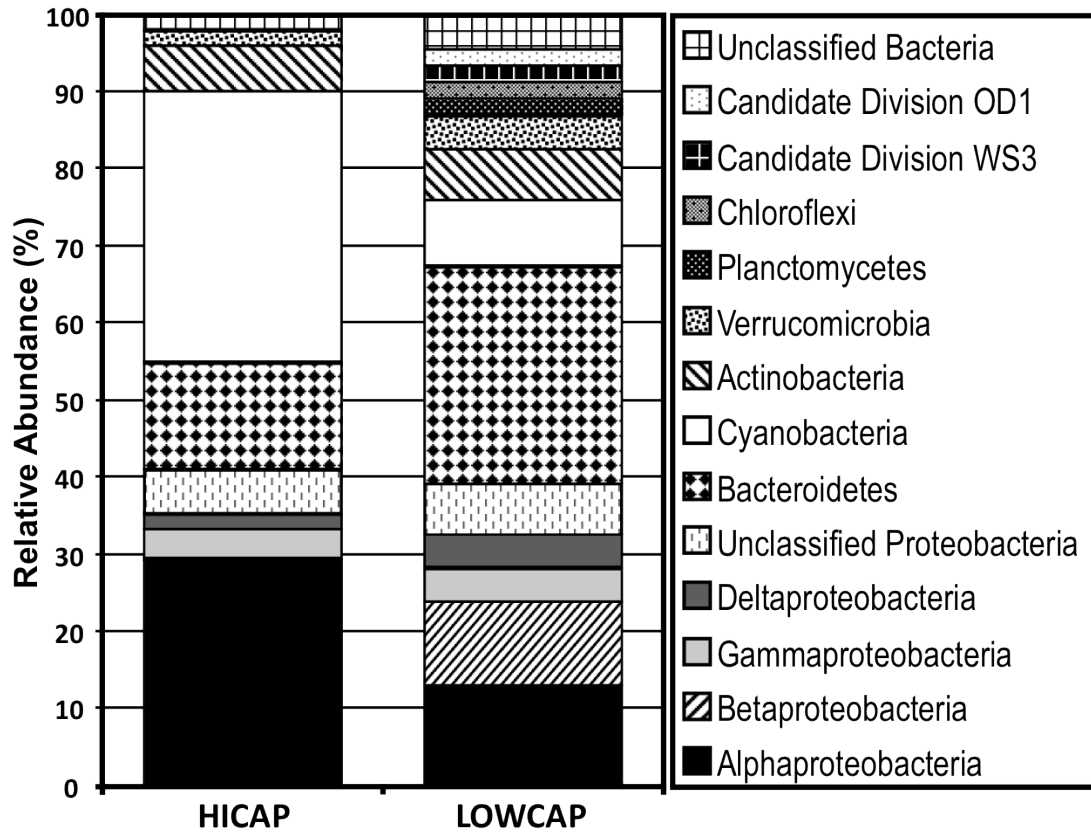

Supplement: pone.0042524.s001.pdf [file pone.0042524.s001.pdf]
