# Supplementary material for: Bacterial Community Dynamics in Full-Scale Activated Sludge Bioreactors: Operational and Ecological Factors Driving Community Assembly and Performance
Source: PubMed Central journal article supplement (PMC3411768; doi:10.1371/journal.pone.0042524), 2012-08-03
Supplement: pone.0042524.s002.pdf [file pone.0042524.s002.pdf]

**Table S1.** Output of SIMPER analysis showing OTUs responsible for approximately 25% of the overall average dissimilarity (~54%) observed between the bacterial communities in the CAS bioreactors<sup>a</sup>

| TRF (bp) <sup>b</sup> | Cum % <sup>c</sup> | Mean abundance <sup>d</sup> |             | Restriction enzyme |              |              | Putative Phylogeny <sup>e</sup>            |
|-----------------------|--------------------|-----------------------------|-------------|--------------------|--------------|--------------|--------------------------------------------|
|                       |                    | HC                          | LC          | <i>Hae</i> III     | <i>Rsa</i> I | <i>Msp</i> I |                                            |
| 242                   | 1.40               | 0.73                        | <b>2.86</b> | X                  |              |              | <i>Bacteroidetes, Firmicutes</i>           |
| 245                   | 2.67               | 1.77                        | <b>2.37</b> |                    | X            |              | <i>Deltaproteobacteria</i>                 |
| 230                   | 3.82               | 0.00                        | <b>2.44</b> |                    |              | X            | <i>Firmicutes</i>                          |
| 486                   | 4.86               | <b>3.04</b>                 | 1.14        |                    |              | X            | Various groups                             |
| 239                   | 5.83               | 0.87                        | <b>1.69</b> |                    | X            |              | <i>Alphaproteobacteria</i>                 |
| 240                   | 6.78               | <b>1.54</b>                 | 1.36        | X                  |              |              | <i>Firmicutes</i>                          |
| 494                   | 7.59               | <b>1.58</b>                 | 1.33        |                    |              | X            | <i>Cyanobacteria, Gammaproteobacteria</i>  |
| 233                   | 8.36               | <b>1.70</b>                 | 0.17        | X                  |              |              | <i>Firmicutes</i>                          |
| 63                    | 9.10               | <b>1.50</b>                 | 1.33        |                    | X            |              | <i>Bacteroidetes</i>                       |
| 470                   | 9.84               | <b>3.67</b>                 | 3.08        |                    | X            |              | Various groups                             |
| 477                   | 10.55              | <b>2.27</b>                 | 1.46        |                    | X            |              | Various groups                             |
| 225                   | 11.26              | 0.85                        | <b>1.36</b> |                    |              | X            | <i>Deltaproteobacteria, Firmicutes</i>     |
| 251                   | 11.97              | 0.68                        | <b>1.51</b> |                    | X            |              | <i>Deltaproteobacteria</i>                 |
| 68                    | 12.67              | 0.84                        | <b>1.32</b> | X                  |              |              | <i>Actinobacteria</i>                      |
| 539                   | 13.37              | <b>1.66</b>                 | 0.87        |                    |              | X            | <i>Bacteroidetes, Firmicutes</i>           |
| 237                   | 14.05              | <b>1.18</b>                 | 0.65        | X                  |              |              | <i>Firmicutes</i>                          |
| 245                   | 14.73              | <b>0.94</b>                 | 0.89        |                    |              | X            | <i>Alphaproteobacteria</i>                 |
| 491                   | 15.40              | <b>2.09</b>                 | 1.48        |                    |              | X            | <i>Betaproteobacteria</i>                  |
| 545                   | 16.06              | 2.34                        | <b>2.52</b> |                    |              | X            | <i>Bacteroidetes, Firmicutes</i>           |
| 68                    | 16.71              | 0.46                        | <b>1.56</b> |                    | X            |              | <i>Gammaproteobacteria</i>                 |
| 60                    | 17.35              | 0.75                        | <b>1.35</b> | X                  |              |              | <i>Gammaproteobacteria</i>                 |
| 110                   | 17.97              | 1.08                        | <b>1.50</b> |                    | X            |              | <i>Alphaproteobacteria</i>                 |
| 227                   | 18.57              | <b>1.74</b>                 | 1.10        | X                  |              |              | <i>Actinobacteria</i>                      |
| 64                    | 19.14              | <b>1.20</b>                 | 0.72        |                    |              | X            | <i>Firmicutes</i>                          |
| 198                   | 19.70              | <b>1.18</b>                 | 0.96        | X                  |              |              | <i>Betaproteobacteria</i>                  |
| 308                   | 20.25              | 1.01                        | <b>1.24</b> | X                  |              |              | <i>Firmicutes</i>                          |
| 500                   | 20.79              | <b>1.47</b>                 | 1.46        |                    |              | X            | <i>Alphaproteobacteria</i>                 |
| 64                    | 21.33              | <b>1.13</b>                 | 0.30        | X                  |              |              | <i>Actinobacteria, Alphaproteobacteria</i> |
| 597                   | 21.87              | <b>1.19</b>                 | 0.16        |                    |              | X            | Various groups                             |
| 426                   | 22.41              | 0.56                        | <b>1.24</b> |                    | X            |              | <i>Cyanobacteria, Deltaproteobacteria</i>  |
| 457                   | 22.94              | 0.67                        | <b>1.02</b> |                    | X            |              | <i>Actinobacteria, Firmicutes</i>          |
| 175                   | 23.46              | <b>0.82</b>                 | 0.42        |                    | X            |              | <i>Bacteroidetes, Firmicutes</i>           |
| 257                   | 23.98              | <b>1.10</b>                 | 0.70        | X                  |              |              | <i>Gammaproteobacteria, Actinobacteria</i> |
| 218                   | 24.49              | <b>1.56</b>                 | 1.45        | X                  |              |              | Various groups                             |
| 71                    | 24.99              | 0.35                        | <b>1.13</b> |                    |              | X            | Various groups                             |

<sup>a</sup>SIMPER: Similarity Percent; OTU: Operational Taxonomic Unit; CAS: Conventional Activated Sludge

<sup>b</sup>TRF (bp): Terminal Restriction Fragments identified by their size in base pairs

<sup>c</sup>Cum %: Cumulative percent of contribution to the overall dissimilarity between groups

<sup>d</sup>Values in bold show in which CAS bioreactor that taxa (population) was more abundant

<sup>e</sup>Putative phylogeny determined with the Phylogenetic Assignment Tool (PAT+); Various Groups: 3 or more phylogenetic groups (Phyla) were associated to this TRF
